# Supplementary material for: Immunological profile of mice immunized with a polyvalent virosome-based influenza vaccine
Source: Virol J. 2023 Aug 21;20:187. doi: 10.1186/s12985-023-02158-0 (PMC10463652; doi:10.1186/s12985-023-02158-0)
Supplement: Supplementary file 2 — Supplementary Material 2 [file 12985_2023_2158_MOESM2_ESM.docx]

**Table S1.** Biochemical parameters of renal and liver function of mice after two doses of multivalent vaccine for swine influenza.

| **Variable** |  | **Groups** |  | **Pr>F** |
| --- | --- | --- | --- | --- |
| **G1** | **G2** | **G3** |
| **ALT** | 50.76±2.05b | 59.41±2.29 a | 56.31±2.22 ab | 0.0298 |
| **AST** | 80.30±5.06 | 71.35±4.78 | 73.90±5.08 | 0.4346 |
| **Creatinine** | 0.445±0.043 | 0.332±0.033 | 0.339±0.032 | 0.0669 |
| **BUN** | 17.19±1.29b | 18.14±0.71a | 18.70±0.7 a | <0.0001 |

Means followed by distinct letters in the lines differ significantly by Tukey's test (*P*≤0.05).

**Table S2.** Stimulation proliferation index for lymphocytes from splenocytes for H1N1, H1N2 and H3N2 among all groups at 21 days (52 days) and 8 months (255 days) after booster immunization.

| **Immune cells** |  | **Intramuscular** | **Intranasal** | | **Intramuscular** | | **Intranasal** | **Intramuscular** | | **Intranasal** |
| --- | --- | --- | --- | --- | --- | --- | --- | --- | --- | --- |
|  | **36 days** | | | | | | | | |
|  |  | **H1N1** | | **H1N2** | | | | **H3N2** | | |
| **B cells** | CD19+CD69+ | 2.394±0.261d | 3.657±0.098e | | 2.161±0.184e | | 2.663±0.105e | 1.608±0.148b | | 2.942±0.095e |
|  | CD19+CD69+CD25+ | 1.515±0.076e | 2.391±0.162e | | 1.231±0.161 | | 1.748±0.134d | 1.303±0.136a | | 2.298±0.136e |
|  | CD45R/B220+sIgM+ | 2.032±0.149d | 2.615±0.206e | | 1.958±0.219b | | 2.397±0.117e | 2.110±0.142e | | 2.735±0.225e |
|  | CD45R/B220+sIgM+CD23+ | 1.785±0.350a | 1.601±0.153b | | 2.393±0.526a | | 2.138±0.221d | 2.558±0.327c | | 2.527±0.282d |
| **T cells** | CD3e+CD4+ | 1.839±0.091e | 1.743±0.077e | | 1.813±0.104e | | 1.695±0.148c | 1.860±0.107e | | 1.793±0.145d |
|  | CD3e+CD8α+ | 2.249±0.088e | 2.293±0.091e | | 1.664±0.041e | | 1.617±0.120c | 1.741±0.093e | | 1.724±0.091e |
|  | CD3e+CD69+ | 1.809±0.074e | 2.324±0.119e | | 1.658±0.201a | | 2.543±0.127e | 2.226±0.249c | | 3.361±0.146e |
|  | CD3e+CD69+ CD25+ | 6.717±0.122e | 4.210±0.245e | | 7.326±0.234e | | 4.458±0.180e | 6.848±0.181e | | 4.711±0.264e |
|  | CD3e+CD4+CD44high CD62Lhigh | 3.946±0.393e | 3.893±0.155e | | 3.136±0.300e | | 3.302±0.236e | 2.571±0.268d | | 2.796±0.125e |
|  | CD3e+CD4+CD44high CD62Llow | 3.325±0.237e | 2.231±0.230d | | 5.184±0.411e | | 4.293±0.683d | 5.857±0.679e | | 4.471±0.801e |
|  |  | **255 days** | | | | | | | | |
|  |  | **H1N1** | | | | **H1N2** | | | **H3N2** | |
| **B cells** | CD19+CD69+ | 3.204±0.134e | 3.221±0.182e | | 2.749±0.107e | | 2.037±0.218c | 2.703±0.092e | | 2.421±0.189e |
|  | CD19+CD69+CD25+ | 2.759±0.102e | 2.534±0.200e | | 2.141±0.135e | | 1.875±0.176c | 2.434±0.132e | | 2.322±0.126e |
|  | CD45R/B220+sIgM+ | 2.399±0.192e | 2.335±0.201e | | 2.641±0.197e | | 2.156±0.178e | 2.712±0.118e | | 2.426±0.110e |
|  | CD45R/B220+sIgM+CD23+ | 6.717±0.530e | 7.896±0.554e | | 12.70±0.99e | | 12.51±1.14e | 10.63±0.93e | | 13.02±0.94e |
| **T cells** | CD3e+CD4+ | 1.474±0.053e | 1.329±0.070c | | 1.332±0.078b | | 1.313±0.059d | 1.462±0.054e | | 1.252±0.068b |
|  | CD3e+CD8α+ | 1.667±0.082e | 1.406±0.137a | | 1.074±0.076 | | 1.035±0.095 | 1.107±0.054 | | 1.200±0.085a |
|  | CD3e+CD69+ | 1.397±0.082c | 2.040±0.070e | | 1.504±0.089d | | 1.982±0.092e | 2.088±0.125e | | 2.610±0.122e |
|  | CD3e+CD69+ CD25+ | 1.882±0.174c | 1.299±0.120a | | 1.347±0.082b | | 1.097±0.120 | 1.447±0.176a | | 1.737±0.254a |
|  | CD3e+CD4+CD44high CD62Lhigh | 3.555±0.205e | 2.526±0.116e | | 3.518±0.348e | | 2.395±0.130e | 2.566±0.278d | | 2.138±0.124e |
|  | CD3e+CD4+CD44high CD62Llow | 1.938±0.177d | 1.226±0.052b | | 2.893±0.330d | | 2.087±0.176d | 2.959±0.320d | | 2.155±0.110e |

Data are shown as fold change means ± standard error.

a,b,c,d,e Different superscript letters indicate significant statistical differences between groups (a: *P*≤0.05, b: *P*≤0.005, c: *P*≤0.001, d: *P*≤0.0005, e: *P*≤0.0001).
